# Supplementary material for: Structural Basis of Dual Specificity of Sinorhizobium meliloti Clr, a cAMP and cGMP Receptor Protein
Source: PubMed Central journal article supplement (PMC10127613; doi:10.1128/mbio.03028-22), 2023-04-05
Supplement: mbio.03028-22-s0001.pdf [file mbio.03028-22-s0001.pdf]

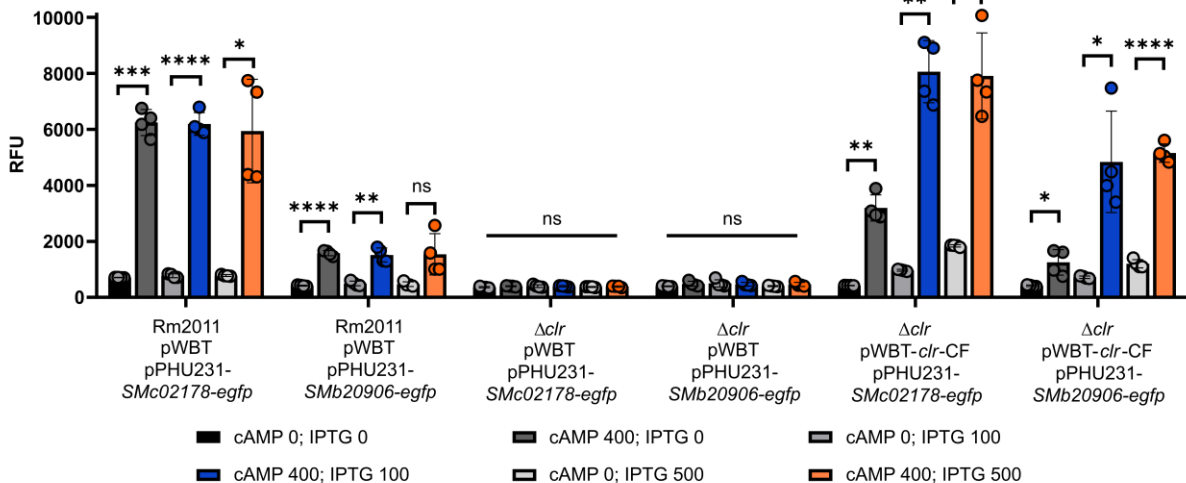

**FIG S1** Functionality of Clr-CF. Relative fluorescent units (RFU) derived from measurements of promoter-*egfp* construct-mediated fluorescence upon IPTG-mediated induction of production of C-terminally FLAG-tagged Clr (Clr-CF). Measurements were carried out in wild type Rm2011 and  $\Delta clr$  24 h post induction with IPTG and cAMP at the indicated concentrations ( $\mu\text{M}$ ). Bar plots show average RFU and their standard deviation derived of four biological replicates. Independent measurements are indicated as dots. Significance was calculated using student's t-test and p-values are indicated with asterisks (ns,  $p > 0.05$ ; \*,  $p \leq 0.05$ ; \*\*,  $p \leq 0.01$ ; \*\*\*,  $p \leq 0.001$ ; \*\*\*\*,  $p \leq 0.0001$ ).
