# Supplementary material for: Structural Basis of Dual Specificity of Sinorhizobium meliloti Clr, a cAMP and cGMP Receptor Protein
Source: PubMed Central journal article supplement (PMC10127613; doi:10.1128/mbio.03028-22), 2023-04-05
Supplement: mbio.03028-22-s0005.pdf [file mbio.03028-22-s0005.pdf]

|                           |        | CRP cluster |                                                  |                                   |                                   |                                    |                                        |                                    |                                      |                                          |                                    |                                                  |                                                    |
|---------------------------|--------|-------------|--------------------------------------------------|-----------------------------------|-----------------------------------|------------------------------------|----------------------------------------|------------------------------------|--------------------------------------|------------------------------------------|------------------------------------|--------------------------------------------------|----------------------------------------------------|
|                           |        | β4          |                                                  |                                   | hinge                             |                                    |                                        | α6                                 |                                      |                                          |                                    |                                                  |                                                    |
| <i>E. coli</i>            | P0ACJ8 | CAP         | D <sup>54</sup><br>s <sup>a,H</sup> <sup>b</sup> | S <sup>63</sup><br>F <sup>b</sup> | R <sup>83</sup><br>G <sup>a</sup> | R <sup>124</sup><br>N <sup>c</sup> | T <sup>128</sup><br>L,C,I <sup>b</sup> | S <sup>129</sup><br>T <sup>b</sup> | D <sup>139</sup><br>N,K <sup>b</sup> | G <sup>142</sup><br>S,Q,K,D <sup>b</sup> | R <sup>143</sup><br>C <sup>b</sup> | A <sup>145</sup><br>T,S,Q,Y,L,F,V,C <sup>b</sup> | L <sup>149</sup><br>K <sup>a</sup> ,R <sup>b</sup> |
| <i>P. aeruginosa</i>      | P55222 | <i>Vfr</i>  | D                                                | S                                 | R                                 | D                                  | T                                      | S                                  | D                                    | G                                        | R                                  | A                                                | L                                                  |
| <i>M. tuberculosis</i>    | P9WMH3 | <i>Crp</i>  | D                                                | S                                 | R                                 | R                                  | T                                      | S                                  | D                                    | G                                        | R                                  | A                                                | L                                                  |
| <i>Y. pestis</i>          | Q79RU4 | <i>Crp</i>  | D                                                | S                                 | R                                 | N                                  | T                                      | S                                  | D                                    | G                                        | R                                  | A                                                | L                                                  |
| <i>V. cholerae</i>        | D7HFP5 |             | D                                                | S                                 | R                                 | R                                  | T                                      | S                                  | D                                    | G                                        | R                                  | A                                                | L                                                  |
| <i>K. pneumoniae</i>      | Q9F435 |             | D                                                | S                                 | R                                 | R                                  | T                                      | S                                  | D                                    | G                                        | R                                  | A                                                | L                                                  |
| <i>S. meliloti</i>        | Q92SD2 | <i>Clr</i>  | T                                                | R                                 | R                                 | A                                  | T                                      | T                                  | D                                    | A                                        | R                                  | A                                                | L                                                  |
| <i>R. centenum</i>        | B6IXV7 | <i>CgrA</i> | S                                                | N                                 | R                                 | R                                  | T                                      | S                                  | N                                    | R                                        | R                                  | A                                                | L                                                  |
| <i>M. magnetotacticum</i> | Q2W4U7 |             | S                                                | G                                 | R                                 | D                                  | A                                      | D                                  | S                                    | S                                        | R                                  | A                                                | L                                                  |
| <i>P. aeruginosa</i>      | Q916L5 |             | S                                                | I                                 | R                                 | K                                  | A                                      | F                                  | P                                    | Q                                        | R                                  | A                                                | L                                                  |

**FIG S5** Differences for sequence motifs in the cNMP binding site and the hinge/α5 and α6 regions. Several mutations in these regions as indicated below the *E. coli* CAP sequence render CAP cGMP-sensitive (a: Yoon *et al.*, Bacteriol 190, 4532–4540 (2008); b: Passner *et al.*, J Mol Biol. 304, 847-59 (2000); c: Yoon *et al.*, J Biol Chem 282, 3632–3639 (2007)). Almost all of these residues are conserved in the main Crp cluster, whereas the proteins from cluster G like Clr show higher diversity.
